# Supplementary material
Source: Springer Nature journal article supplement (https://www.springermedizin.de/resource/supplementary/13052_2013_288_MOESM1_ESM.pdf/9671772)
Supplement: MOESM1 [file 9671772]

1081 children admitted at BMC  
between September 2011 to  
February 2012

Following children were excluded:

- 281 aged < 2 months
- 197 aged > 60 months
- 131 used antibiotics more than 48 hours
- 66 children mothers did not consent
- 89 were not febrile

317 underfives met inclusion  
criteria : Blood culture, full blood  
picture and blood slides were  
done

Underfives  
with  
Bacteremia  
6.6% (21/317)

Underfives with  
*Plasmodium  
falciparum* 25.8%  
(82/317)

Underfives with  
clinical  
pneumonia 17.9%  
(57/317)

Underfives with  
sickle cell  
disease 13.6%  
(43/317)

Underfives with  
undernutrition  
18.9%  
(60/317)
